# Supplementary material for: Xylazine Infusion during Equine Colic Anesthesia with Isoflurane and Lidocaine: A Retrospective Study
Source: MDPI journal article supplement (doi:10.3390/ani13182902), 2023-09-13
Supplement: s1 [file s1]

| Blood gas values                                      | Group L             | Group XL            | p value |
|-------------------------------------------------------|---------------------|---------------------|---------|
| Preoperative lactate (mmol/L)                         | 1.89 (0.62–13.44)   | 1.76 (0.35–11.95)   | 0.95    |
| Preoperative glucose (mg/dL)                          | 132 (95–384)        | 129 (77–302)        | 0.73    |
| Preoperative pH (venous)                              | 7.4 ± 0.05          | 7.4 ± 0.05          | 0.81    |
| Intraoperative pH (arterial)                          | 7.35 ± 0.08         | 7.34 ± 0.06         | 0.71    |
| Preoperative HCO <sub>3</sub> <sup>-</sup> (mmol/L)   | 28 ± 4.4            | 26 ± 4.6            | 0.19    |
| Intraoperative HCO <sub>3</sub> <sup>-</sup> (mmol/L) | 27 ± 4.1            | 27 ± 3.6            | 0.99    |
| Intraoperative PaO <sub>2</sub> (mmHg)                | 132 (51–500)        | 152 (55–500)        | 0.49    |
| Intraoperative PaCO <sub>2</sub> (mmHg)               | 51 ± 6.9            | 50 ± 6.4            | 0.52    |
| Preoperative Natrium (mmol/L)                         | 134 ± 3.1           | 133 ± 2.3           | 0.33    |
| Intraoperative Natrium (mmol/L)                       | 136 ± 3.7           | 135 ± 2.4           | 0.25    |
| Preoperative Chloride (mmol/L)                        | 96 ± 4.2            | 97 ± 3.3            | 0.25    |
| Intraoperative Chloride (mmol/L)                      | 97 ± 4.7            | 96 ± 4.3            | 0.46    |
| Preoperative Calcium (mmol/L)                         | 1.42 ± 0.09         | 1.42 ± 0.1          | 0.83    |
| Intraoperative Calcium (mmol/L)                       | 1.4 ± 0.12          | 1.38 ± 0.09         | 0.45    |
| Preoperative Potassium (mmol/L)                       | 3.51 (3.02–5.21)    | 3.61 (3.01–4.83)    | 0.77    |
| Intraoperative Potassium (mmol/L)                     | 3.36 (2.6–5.91)     | 3.23 (2.21–4.19)    | 0.76    |
| Preoperative Base Excess (mmol/L)                     | 3.3 ( -7.6 – 9.6)   | 2.1 (-9.5 – 10.2)   | 0.23    |
| Intraoperative Base Excess (mmol/L)                   | 2.75 (-20.55 – 8.1) | 1.15 (-9.24 – 7.05) | 0.98    |

**Table S1.** Preoperative and intraoperative blood gas values for group lidocaine (L) and group xylazine-lidocaine (XL) during isoflurane anesthesia for equine colic surgery.
